# Supplementary material
Source: HighWire-hosted journal article supplement (https://fg.bmj.com/highwire/filestream/142887/field_highwire_adjunct_files/0/flgastro-2020-101661supp001_data_supplement.pdf)

**Supplementary Table 1: Comparison of patients attending District General Hospitals (DGH's) compared to those attending University Hospitals (UH's)\***

| Parameter                                              | DGH's<br>n=437 | UH's<br>n=830 | p value |
|--------------------------------------------------------|----------------|---------------|---------|
| Delay between first abnormal LFTs to diagnosis (mo)±SD | 9.5±17         | 8.6±17        | ns      |
| Delay diagnosis to start of treatment (mo)±SD          | 1.6±7          | 1.6±8         | ns      |
| Delay in starting SSA (mo)±SD                          | 0.41±0.9       | 0.27±0.68     | 0.006   |
| Received steroids: N (%)                               | 393/437 (90)   | 779/830 (94)  | 0.011   |
| Initial dose of Prednisolone (mg/day) ±SD              | 32.1±10        | 31.7±13       | ns      |
| Initial steroid Budesonide: N (%)                      | 11/391 (3)     | 47/778 (6)    | 0.016   |
| Mean serum ALT (IU/L) ±SD at start of treatment        | 336±477        | 461±496       | <0.001  |
| And after 28 days                                      | 113±184        | 100±139       | ns      |
| 3 months                                               | 100±181        | 65±104        | 0.004   |
| 6 months                                               | 62±134         | 55±123        | ns      |
| 12 months                                              | 55±252         | 46±89         | ns      |
| Serum ALT % change at 28 days (n)                      | -20±146        | -63±47        | <0.0001 |
| 3 months (n)                                           | -35±108        | -65±72        | <0.001  |
| 6 months (n)                                           | -37±169        | -71±45        | 0.002   |
| 12 months (n)                                          | -23±500        | -74±30        | 0.02    |
| % with normal ALT at 28 days (n)                       | 20             | 62            | 0.007   |
| 3 months (n)                                           | 5              | 68            | 0.001   |
| 6 months (n)                                           | 36             | 70            | 0.002   |
| 12 months (n)                                          | 55             | 63            | 0.03    |
| % with at least one normal ALT within 12 months        | 67             | 74            | 0.047   |

\*Essentially identical results were obtained when patients not receiving steroids were excluded from analysis

**Supplementary Table 2: Standards in University hospitals (n=830 cases) versus District General Hospitals (n=437 cases)**

| Standard                                                                                                                      | UH's<br>n (%) | Standard<br>met | DGH's<br>n (%) | Standard<br>met | p value |
|-------------------------------------------------------------------------------------------------------------------------------|---------------|-----------------|----------------|-----------------|---------|
| a) ≥90% of symptomatic patients start prednisolone <sup>~</sup> within 4 months of diagnosis                                  | 540/593 (95)  | ✓               | 258/284 (91)   | ✓               | 0.9     |
| b) ≥90% Steroids continued ≥1 year*                                                                                           | 495/658 (75)  | ✗               | 250/341 (73)   | ✗               | 0.51    |
| c) ≥80% adequate blood monitoring <sup>++</sup>                                                                               | 560/744 (75)  | ✗               | 280/389 (72)   | ✗               | 0.23    |
| d) ≥90% attain normal serum ALT at 1 year treatment <sup>**</sup>                                                             | 598/716 (84)  | ✗               | 281/360 (78)   | ✗               | 0.02    |
| e) ≥80% clinically decompensated patients <sup>‡</sup> who did not improve on treatment were discussed with a transplant team | 103/108 (95)  | ✓               | 40/42 (95)     | ✓               | 0.97    |
| f) ≥60% of those re-biopsied attain histological remission <sup>***</sup>                                                     | 69/195 (35)   | ✗               | 34/74 (46)     | ✗               | 0.11    |
| g) ≥75% do not develop de-novo cirrhosis                                                                                      | 571/617 (93)  | ✓               | 308/334 (92)   | ✓               | 0.89    |
| h) ≤21% new clinical decompensation                                                                                           | 32/754 (4)    | ✓               | 10/405 (2.5)   | ✓               | 0.12    |

<sup>~</sup>or equivalent (Budesonide/methylprednisolone/hydrocortisone) as proportion of symptomatic patients.

\*In those followed up ≥1 year. <sup>†</sup>Liver Blood tests documented at 3, 6 & 12 months adjusted for length of follow-up. \*\*In those with ≥12months follow up after treatment started & date of first normal ALT is known.

\*\*\*Necroinflammatory score available in 195 (of 247) UH and 74 (of 86) DGH of follow-up biopsies respectively.

**Supplementary Table 3: Centres with specialist nurses seeing patients (n=5) versus those attending centres without (n=23).**

|                                                                                                                               | Sp Nurse sees pts<br>n=400<br>n (%) | Standard met | No Sp nurse seeing pts<br>n=1148<br>n (%) | Standard met | p value |
|-------------------------------------------------------------------------------------------------------------------------------|-------------------------------------|--------------|-------------------------------------------|--------------|---------|
| a) ≥90% of symptomatic patients start prednisolone <sup>~</sup> within 4 months of diagnosis                                  | 275/291 (95)                        | ✓            | 543/586 (93)                              | ✓            | 0.3     |
| b) ≥90% Steroids continued ≥1 year*                                                                                           | 239/293 (82)                        | ✗            | 506/706 (72)                              | ✗            | 0.001   |
| c) ≥80% adequate blood monitoring <sup>++</sup>                                                                               | 239/347 (69)                        | ✗            | 601/786 (76)                              | ✗            | 0.007   |
| d) ≥90% attain normal serum ALT at 1 year treatment <sup>***</sup>                                                            | 270/331 (82)                        | ✗            | 609/745 (82)                              | ✗            | 0.94    |
| e) ≥80% clinically decompensated patients <sup>‡</sup> who did not improve on treatment were discussed with a transplant team | 45/48 (94)                          | ✓            | 96/102 (94)                               | ✓            | 0.93    |
| f) ≥60% of those re-biopsied attain histological remission                                                                    | 49/123 (40)                         | ✗            | 54/148 (36)                               | ✗            | 0.6     |
| g) ≥75% do not develop de-novo cirrhosis                                                                                      | 279/303 (92)                        | ✓            | 881/929 (95)                              | ✓            | 0.08    |
| h) ≤21% new clinical decompensation                                                                                           | 14/366 (4)                          | ✓            | 28/1074 (3)                               | ✓            | 0.23    |

<sup>~</sup>or equivalent (Budesonide/methylprednisolone/hydrocortisone) as proportion of symptomatic patients.

\*In those followed up ≥1 year.

<sup>++</sup>Liver Blood tests documented at 3 months, 6 months & 12 months adjusted for length of follow-up.

<sup>\*\*\*</sup>In those with ≥12months follow up after treatment started & date of first normal ALT is known.

**Supplementary Table 4: Centres with a Hepatologist (n=20) versus those without a Hepatologist (n=8).**

|                                                                                                                               | Hepatologist<br>n=1033 patients<br>n (%) | Standard<br>met | No Hepatologist<br>n=234 patients<br>n (%) | Standard<br>met | p value |
|-------------------------------------------------------------------------------------------------------------------------------|------------------------------------------|-----------------|--------------------------------------------|-----------------|---------|
| a) ≥90% of symptomatic patients start prednisolone <sup>~</sup> within 4 months of diagnosis                                  | 675/722 (93)                             | ✓               | 143/155 (92)                               | ✓               | 0.58    |
| b) ≥90% Steroids continued ≥1 year*                                                                                           | 612/819 (75)                             | ✗               | 133/180 (74)                               | ✗               | 0.81    |
| c) ≥80% adequate blood monitoring <sup>++</sup>                                                                               | 694/920 (75)                             | ✗               | 146/213 (69)                               | ✗               | 0.04    |
| d) ≥90% attain normal serum ALT at 1 year treatment <sup>***</sup>                                                            | 744/899 (83)                             | ✗               | 135/177 (76)                               | ✗               | 0.04    |
| e) ≥80% clinically decompensated patients <sup>‡</sup> who did not improve on treatment were discussed with a transplant team | 122/130 (94)                             | ✓               | 19/20 (95)                                 | ✓               | 0.84    |
| f) ≥60% of those re-biopsied attain histological remission                                                                    | 78/230 (34)                              | ✗               | 25/53 (47)                                 | ✗               | 0.07    |
| g) ≥75% do not develop de-novo cirrhosis                                                                                      | 701/763 (92)                             | ✓               | 178/188 (95)                               | ✓               | 0.19    |
| h) ≤21% new clinical decompensation                                                                                           | 35/938 (4)                               | ✓               | 7/221 (3)                                  | ✓               | 0.69    |

<sup>~</sup>or equivalent (Budesonide/methylprednisolone/hydrocortisone) as proportion of symptomatic patients.

\*In those followed up ≥1 year.

<sup>++</sup>Liver Blood tests documented at 3 months, 6 months & 12 months adjusted for length of follow-up.

<sup>\*\*\*</sup>In those with ≥12months follow up after treatment started & date of first normal ALT is known.

**Supplementary Figure 1: All cause death/transplant rate in patients attending DGH's compared to UH's**

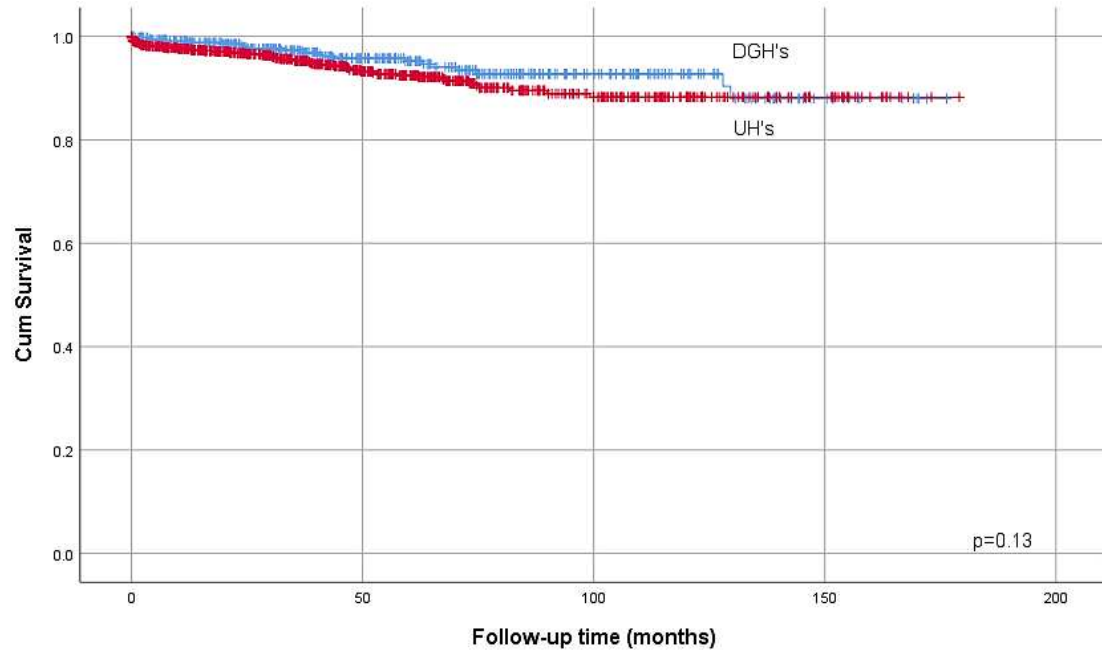

Supplement: flgastro-2020-101661supp001_data_supplement.pdf [file flgastro-2020-101661supp001_data_supplement.pdf]
